# Supplementary material for: Primary care-based smoking cessation treatment and subsequent healthcare service utilisation: a matched cohort study of smokers using linked administrative healthcare data
Source: HighWire-hosted journal article supplement (doi:10.1136/tobaccocontrol-2021-056522), 2021-06-03
Supplement: tobaccocontrol-2021-056522supp002_data_supplement.pdf [file tobaccocontrol-2021-056522supp002_data_supplement.pdf]

**Figure S1.** Flow chart of derivation of treatment and control cohorts.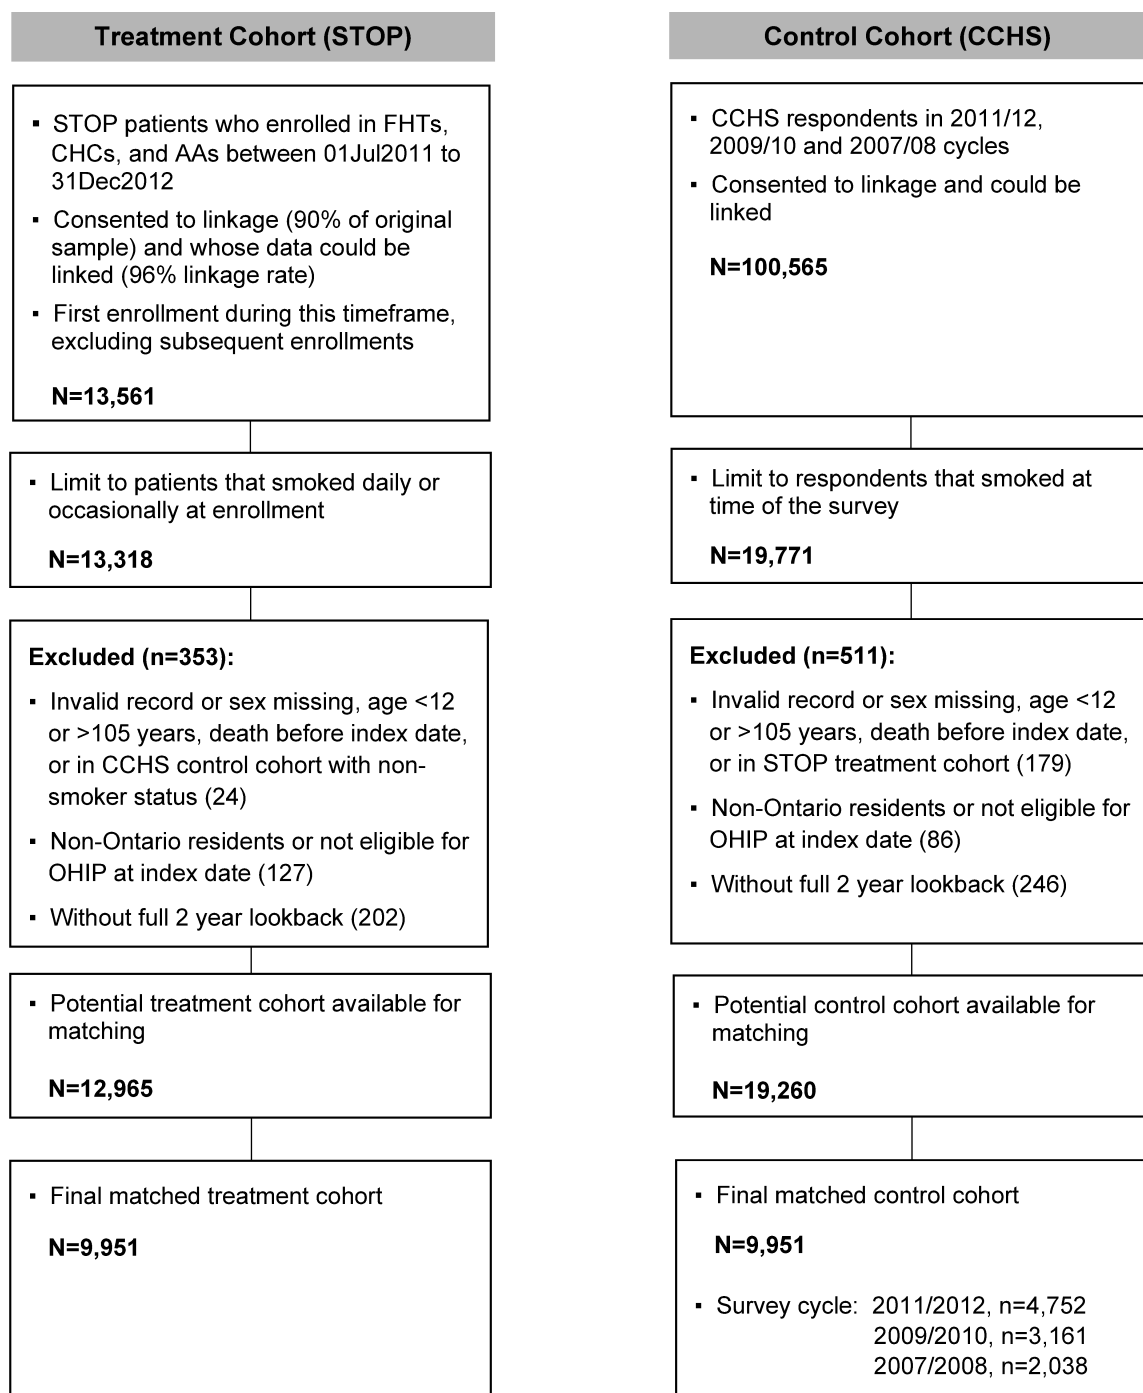

Abbreviations: CCHS = Canadian Community Health Survey; STOP = Smoking Treatment for Ontario Patients; AA = Addiction Agency; CHC = Community Health Centre; FHT = Family Health Team; OHIP = Ontario Health Insurance Plan.
